# Supplementary material
Source: PubMed Central journal article supplement (PMC5082984)

# Supplementary Figure S1

Chen *et al*

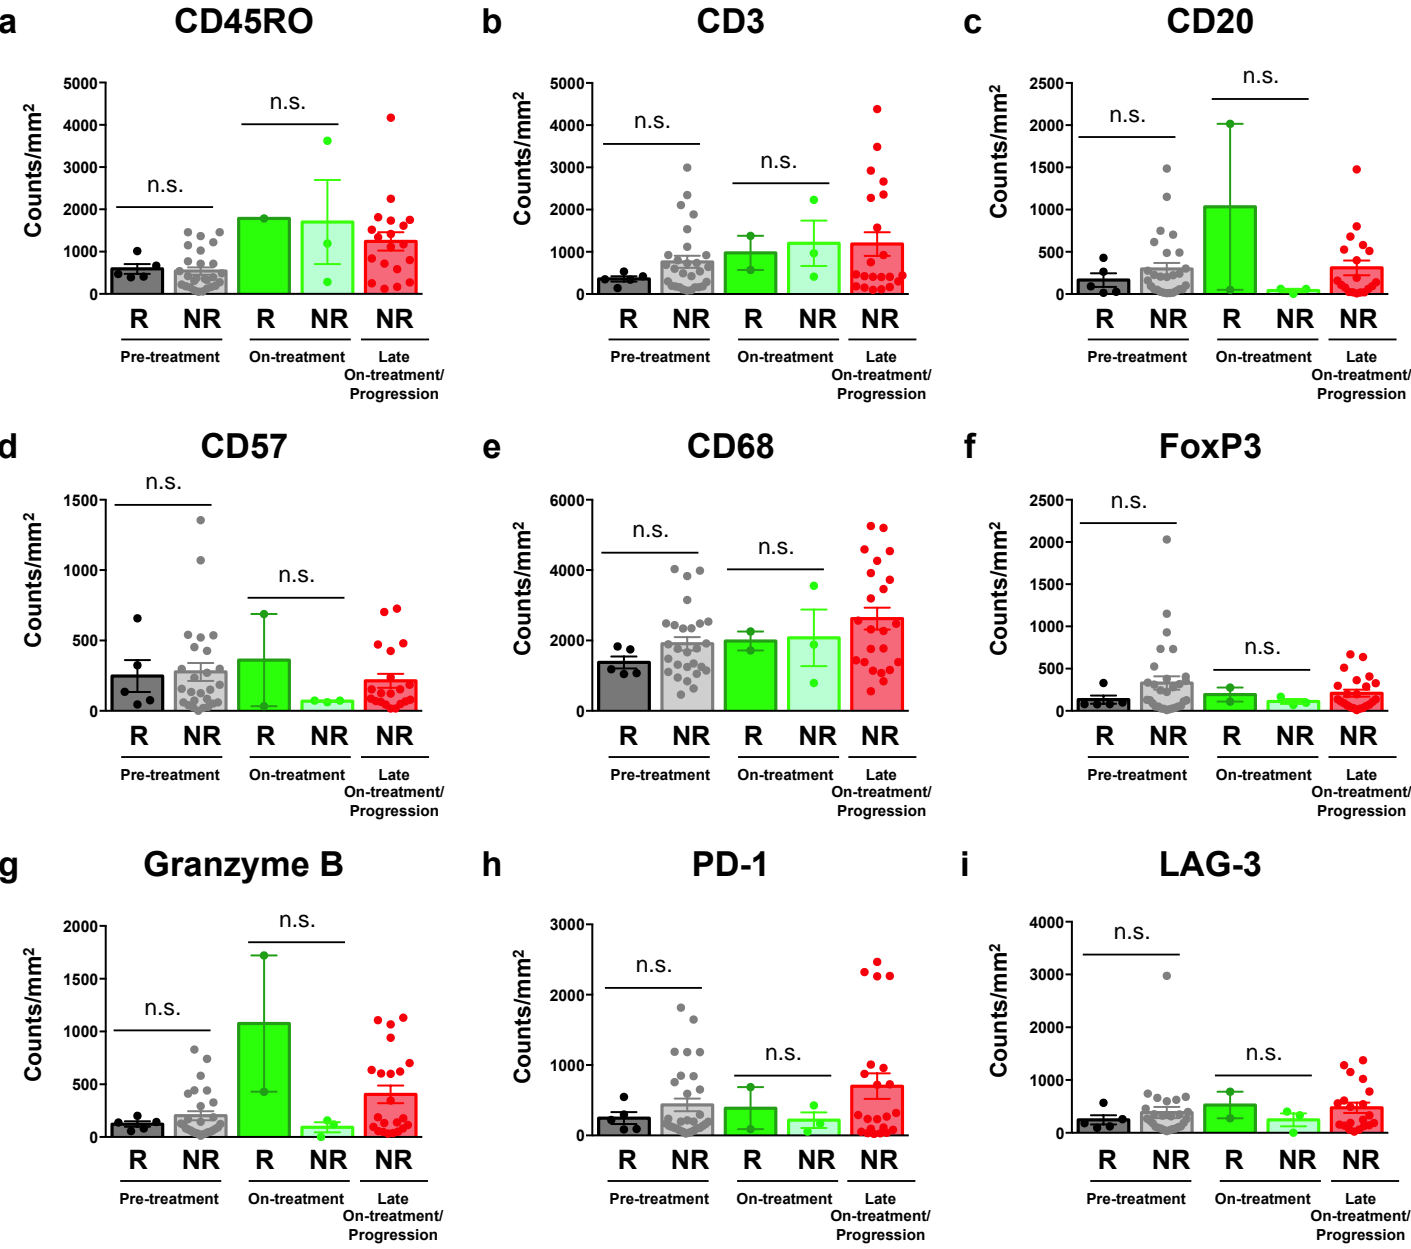

CTLA-4 Blockade

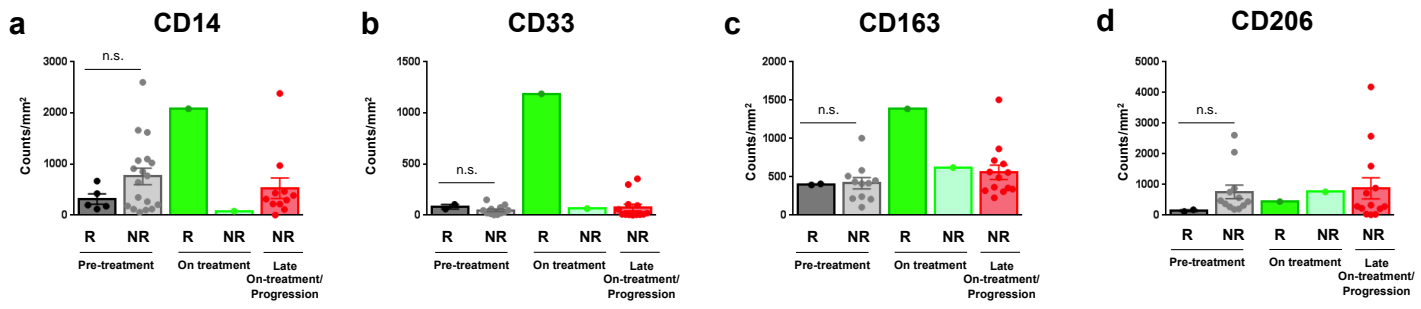

Pre-treatment

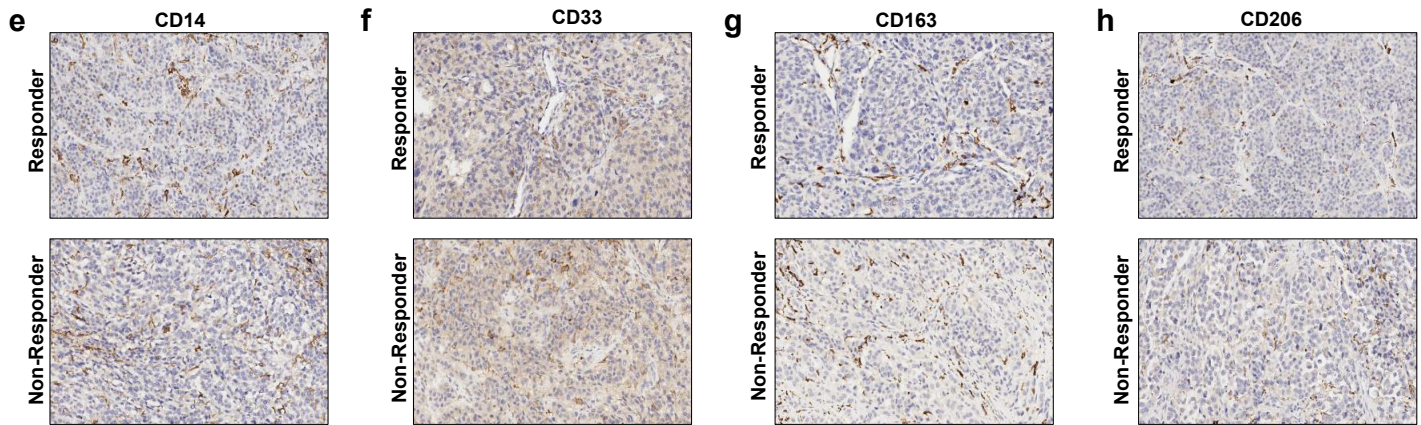

# Supplementary Figure 3

Chen *et al*

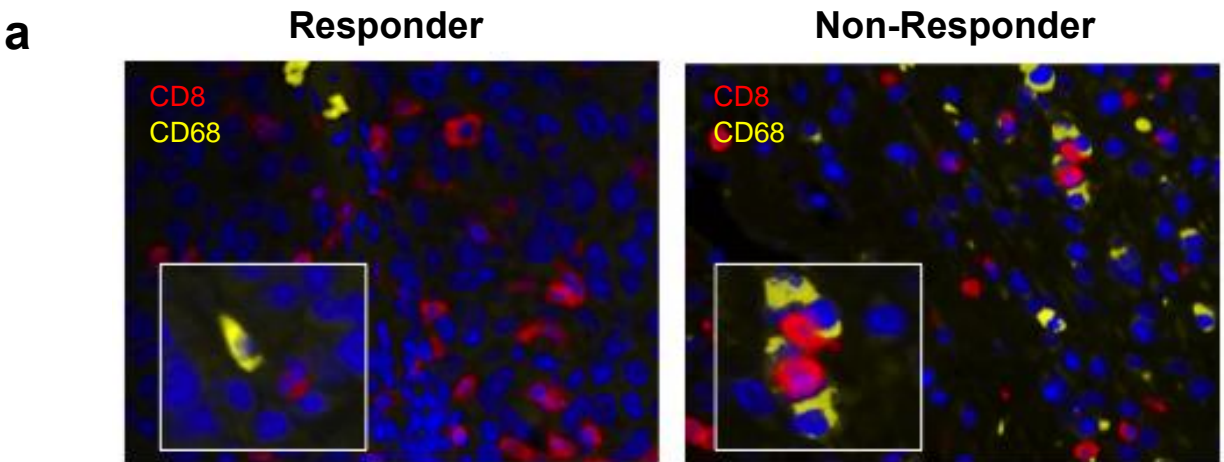

**b**

| Treatment Timepoint    | % Contact Between CD8 and CD68 Cells |                    |         |
|------------------------|--------------------------------------|--------------------|---------|
|                        | Responders (n)                       | Non-Responders (n) | p-value |
| <b>CTLA-4 Blockade</b> |                                      |                    |         |
| Pre-treatment          | <10% (2)                             | 30-40% (3)         | 0.08    |
| On treatment           | 10-20% (1)                           | 30-40% (1)         | N/A     |
| <b>PD-1 Blockade</b>   |                                      |                    |         |
| Pre-treatment          | 10-20% (3)                           | 50-60% (3)         | 0.0495  |
| On treatment           | <10% (3)                             | 30-40% (3)         | 0.0495  |

# Supplementary Figure S4

Chen *et al*

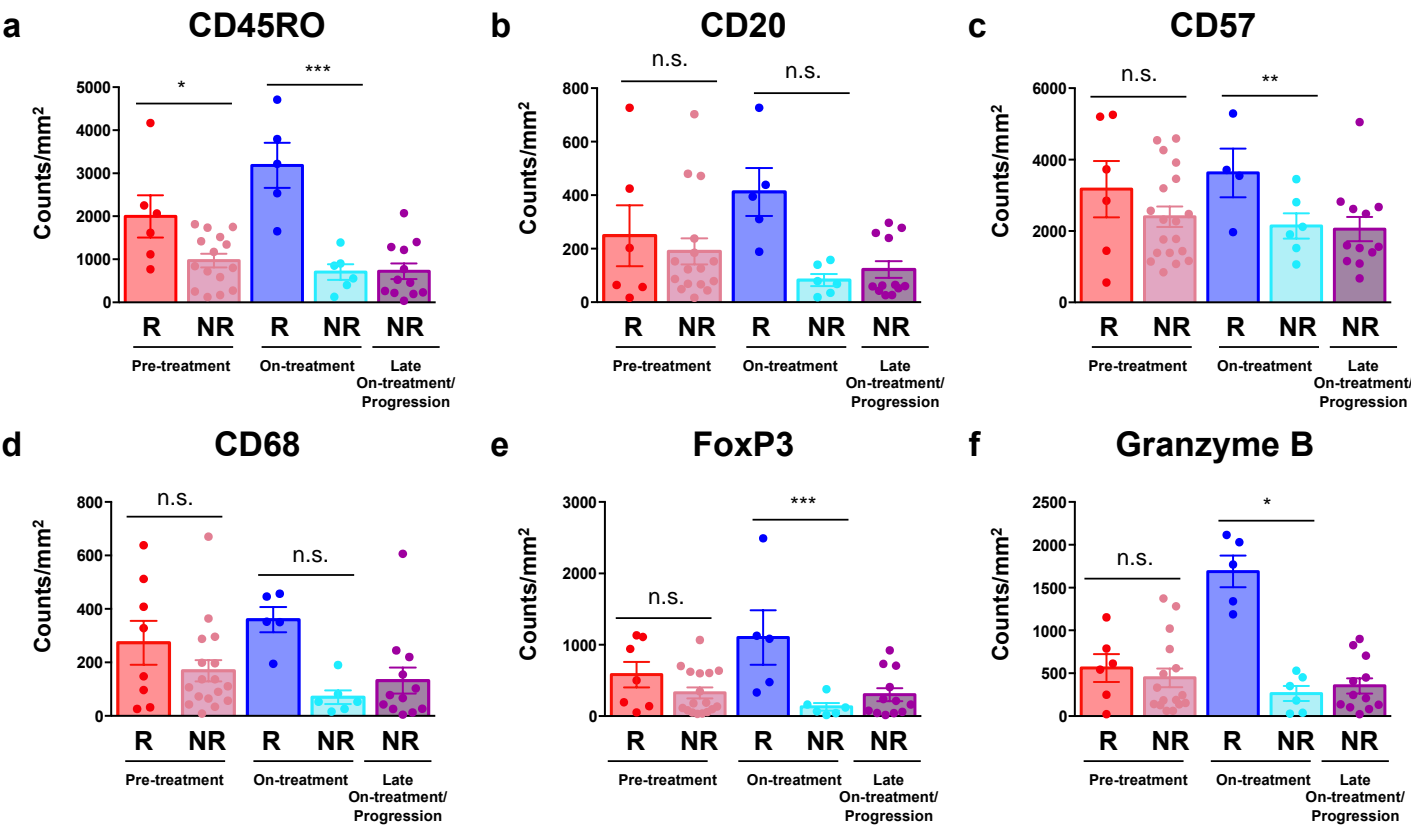

# Supplementary Figure 5

Chen *et al*

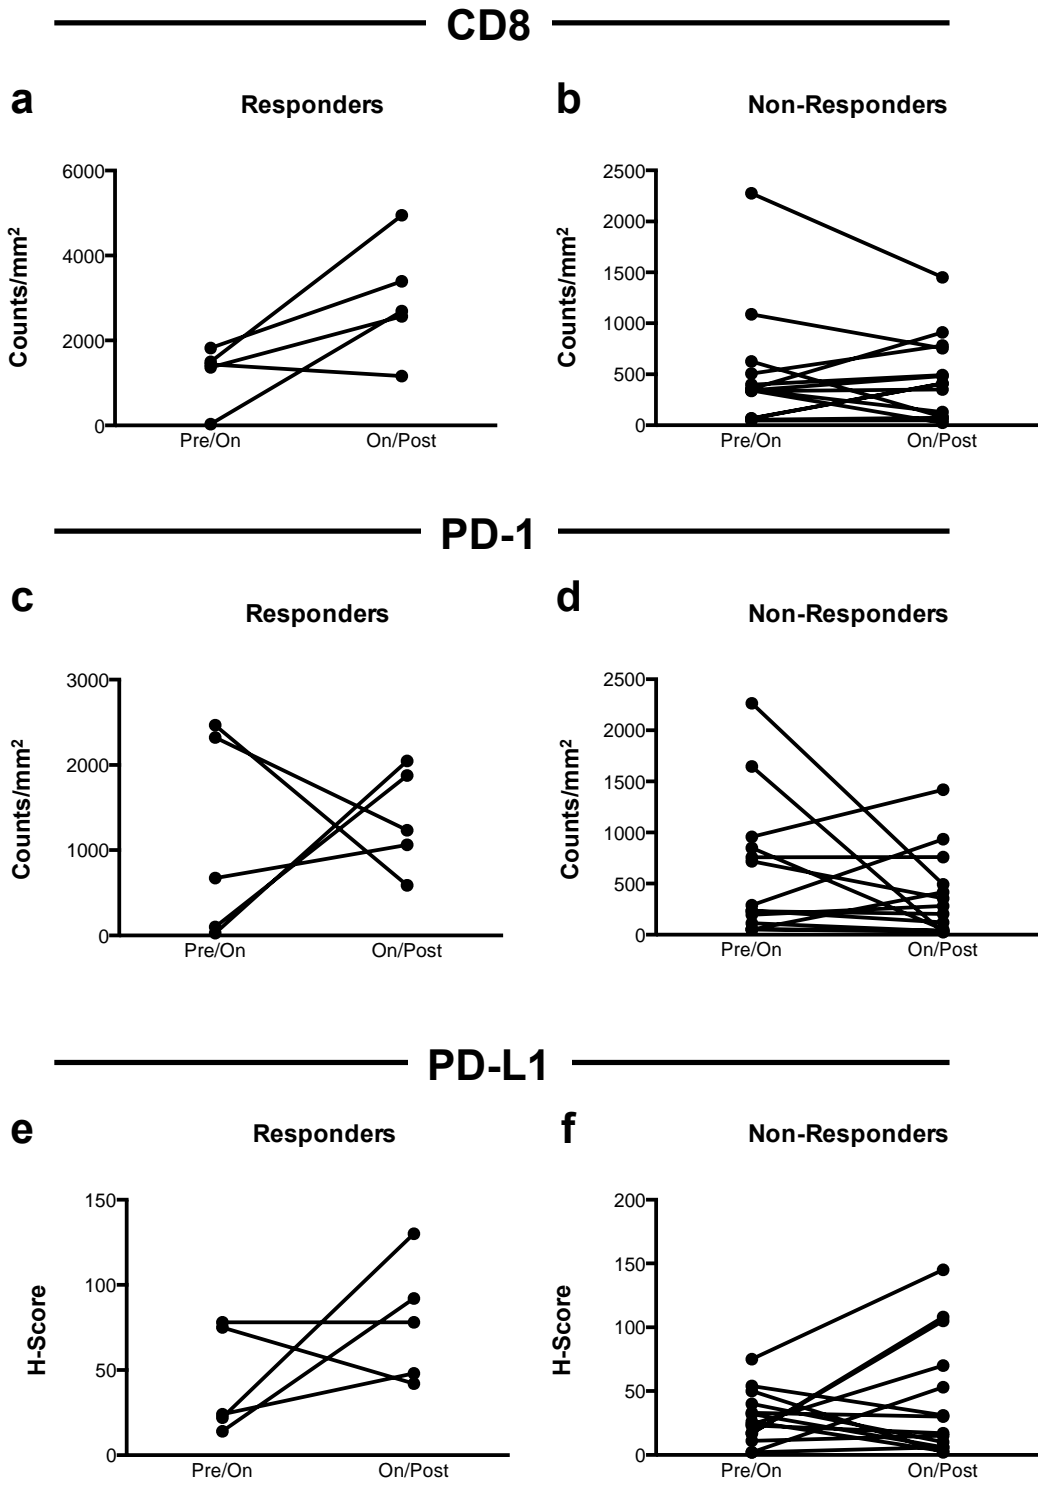

# Supplementary Figure 6

Chen *et al*

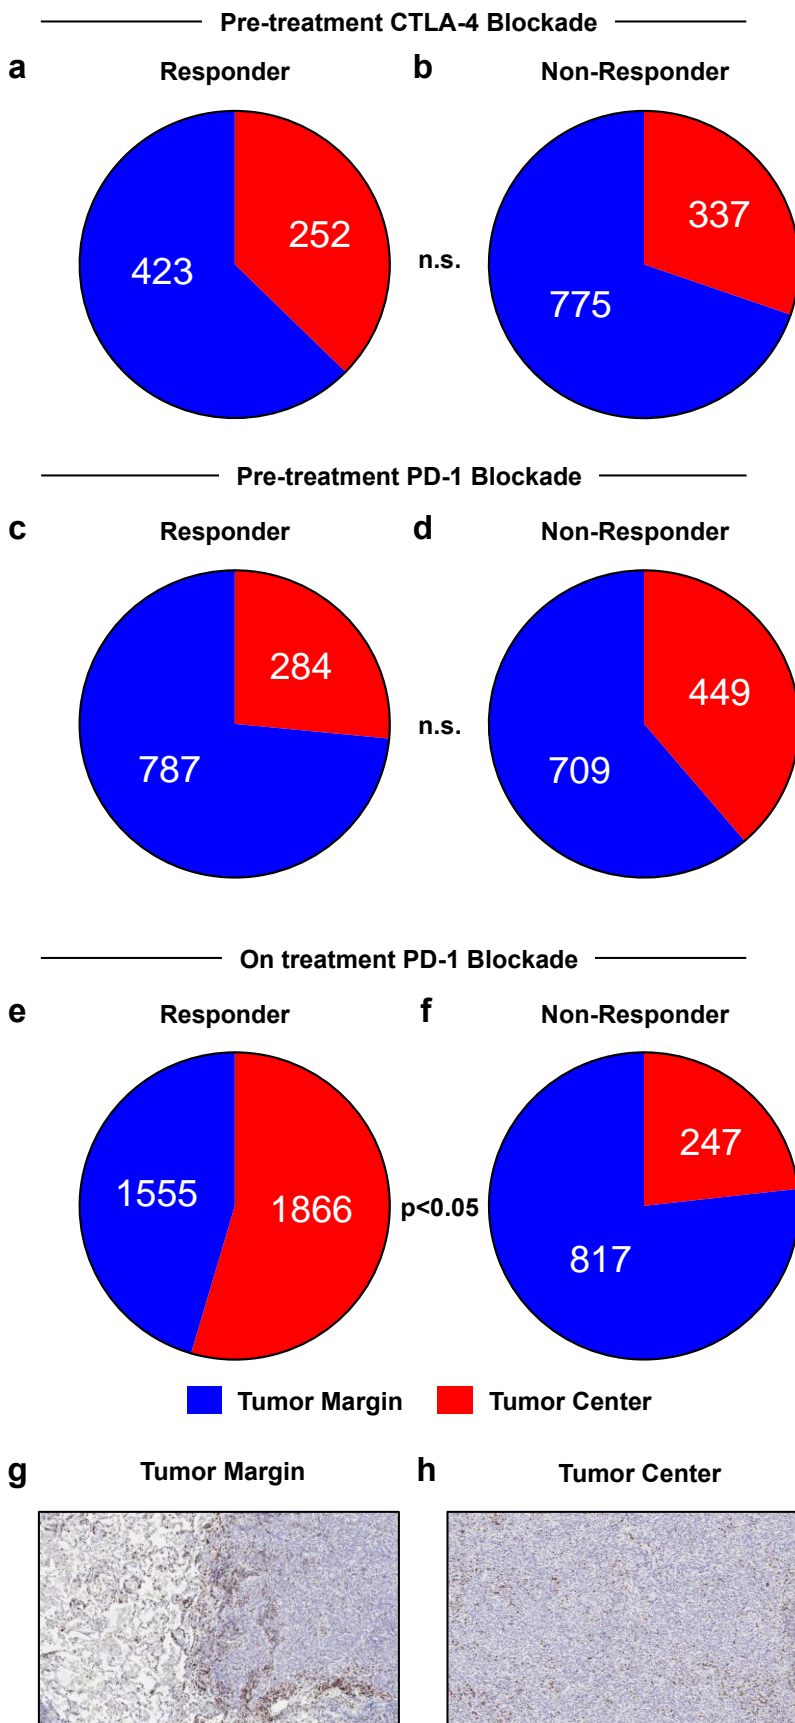

# Supplementary Figure S7

Chen *et al*

a

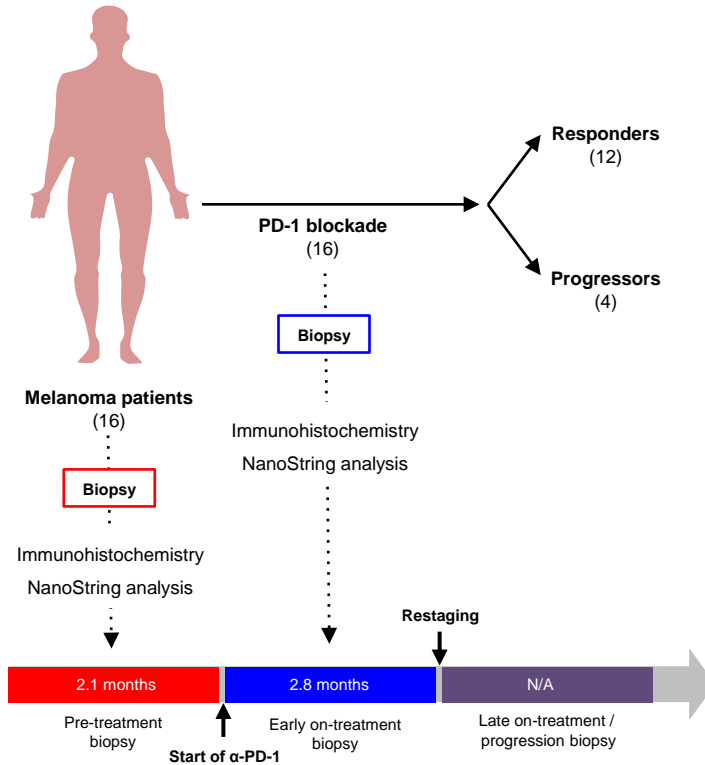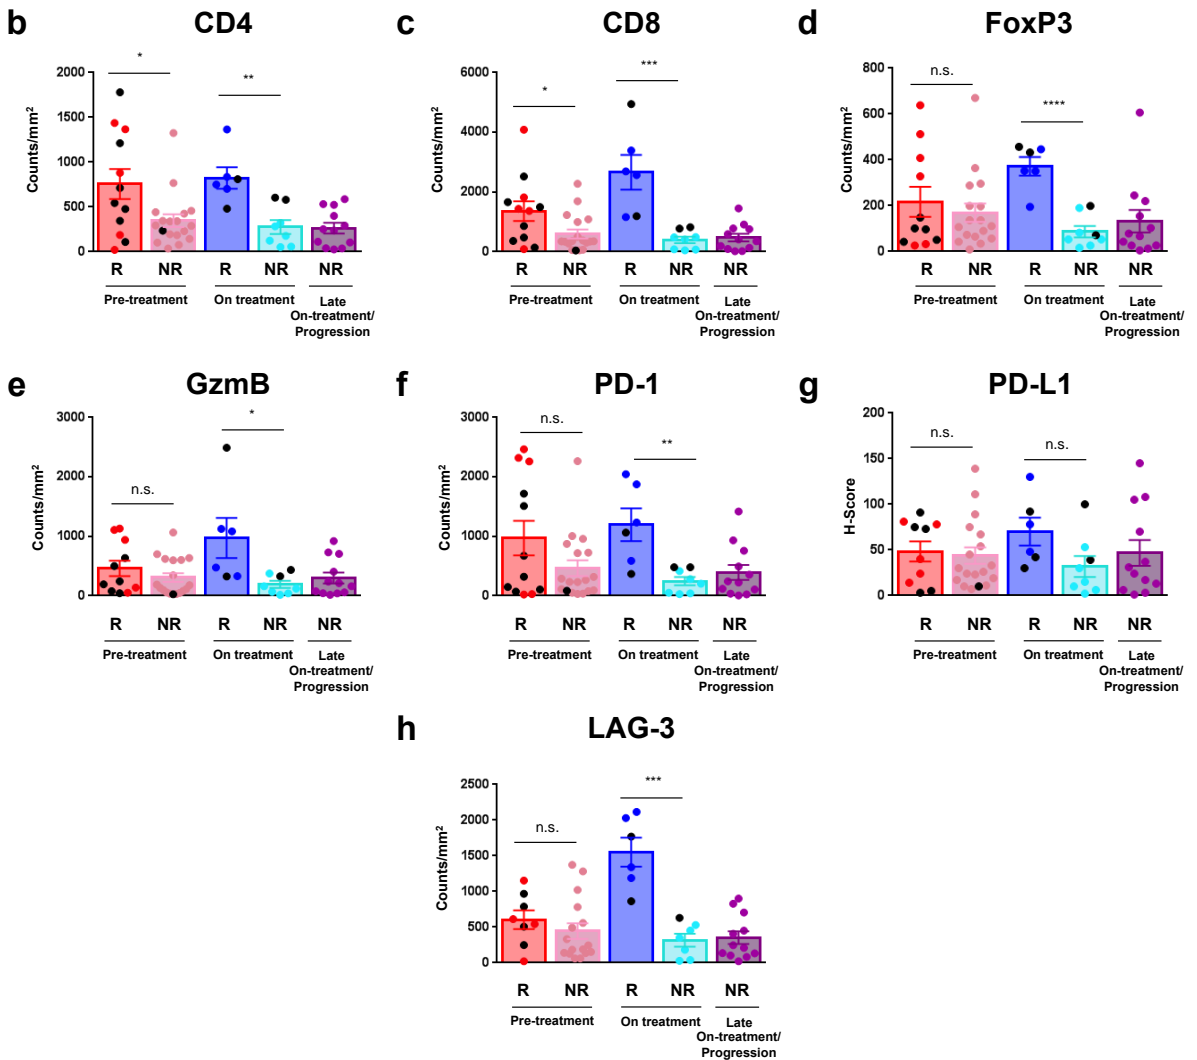

# Supplementary Figure S8

Chen *et al*

## PD-1 Blockade

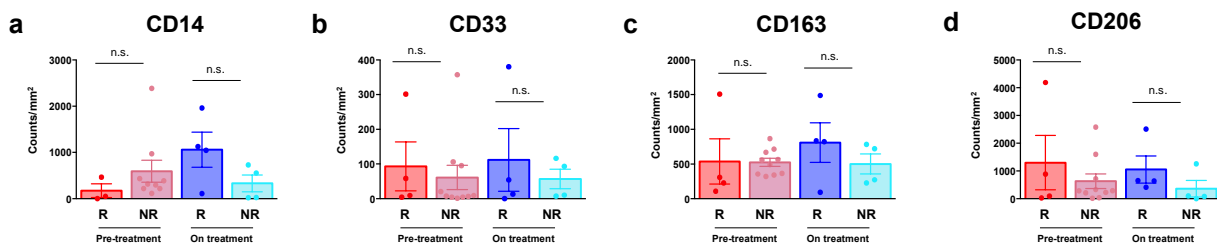

## Pre-treatment

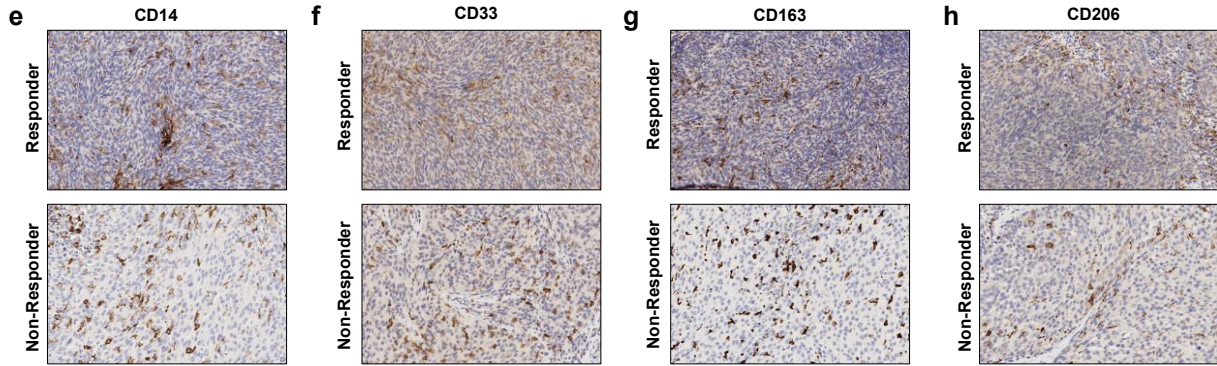

## On-treatment

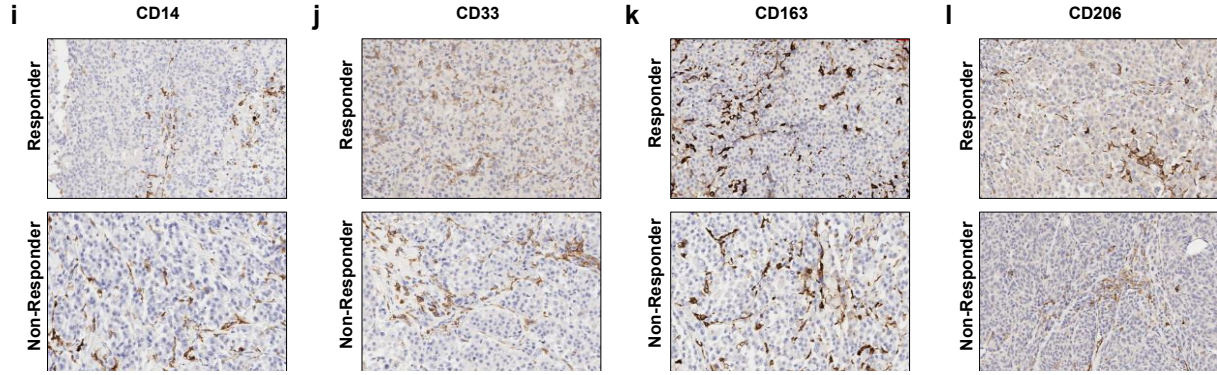



# Supplementary Figure S9

Chen *et al*

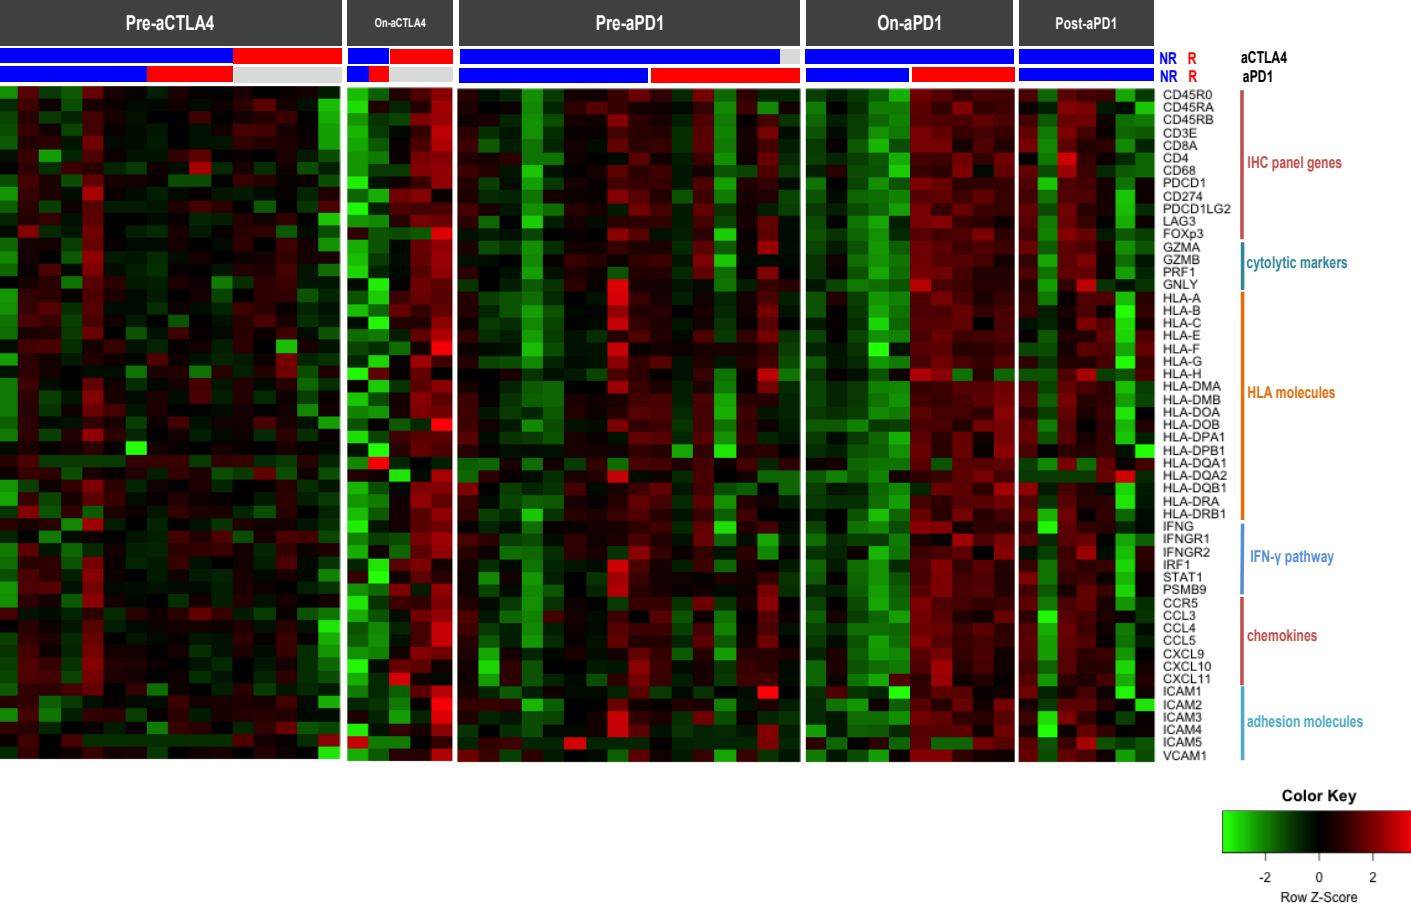

# Supplementary Figure 10

Chen *et al*

## CTLA-4 Blockade

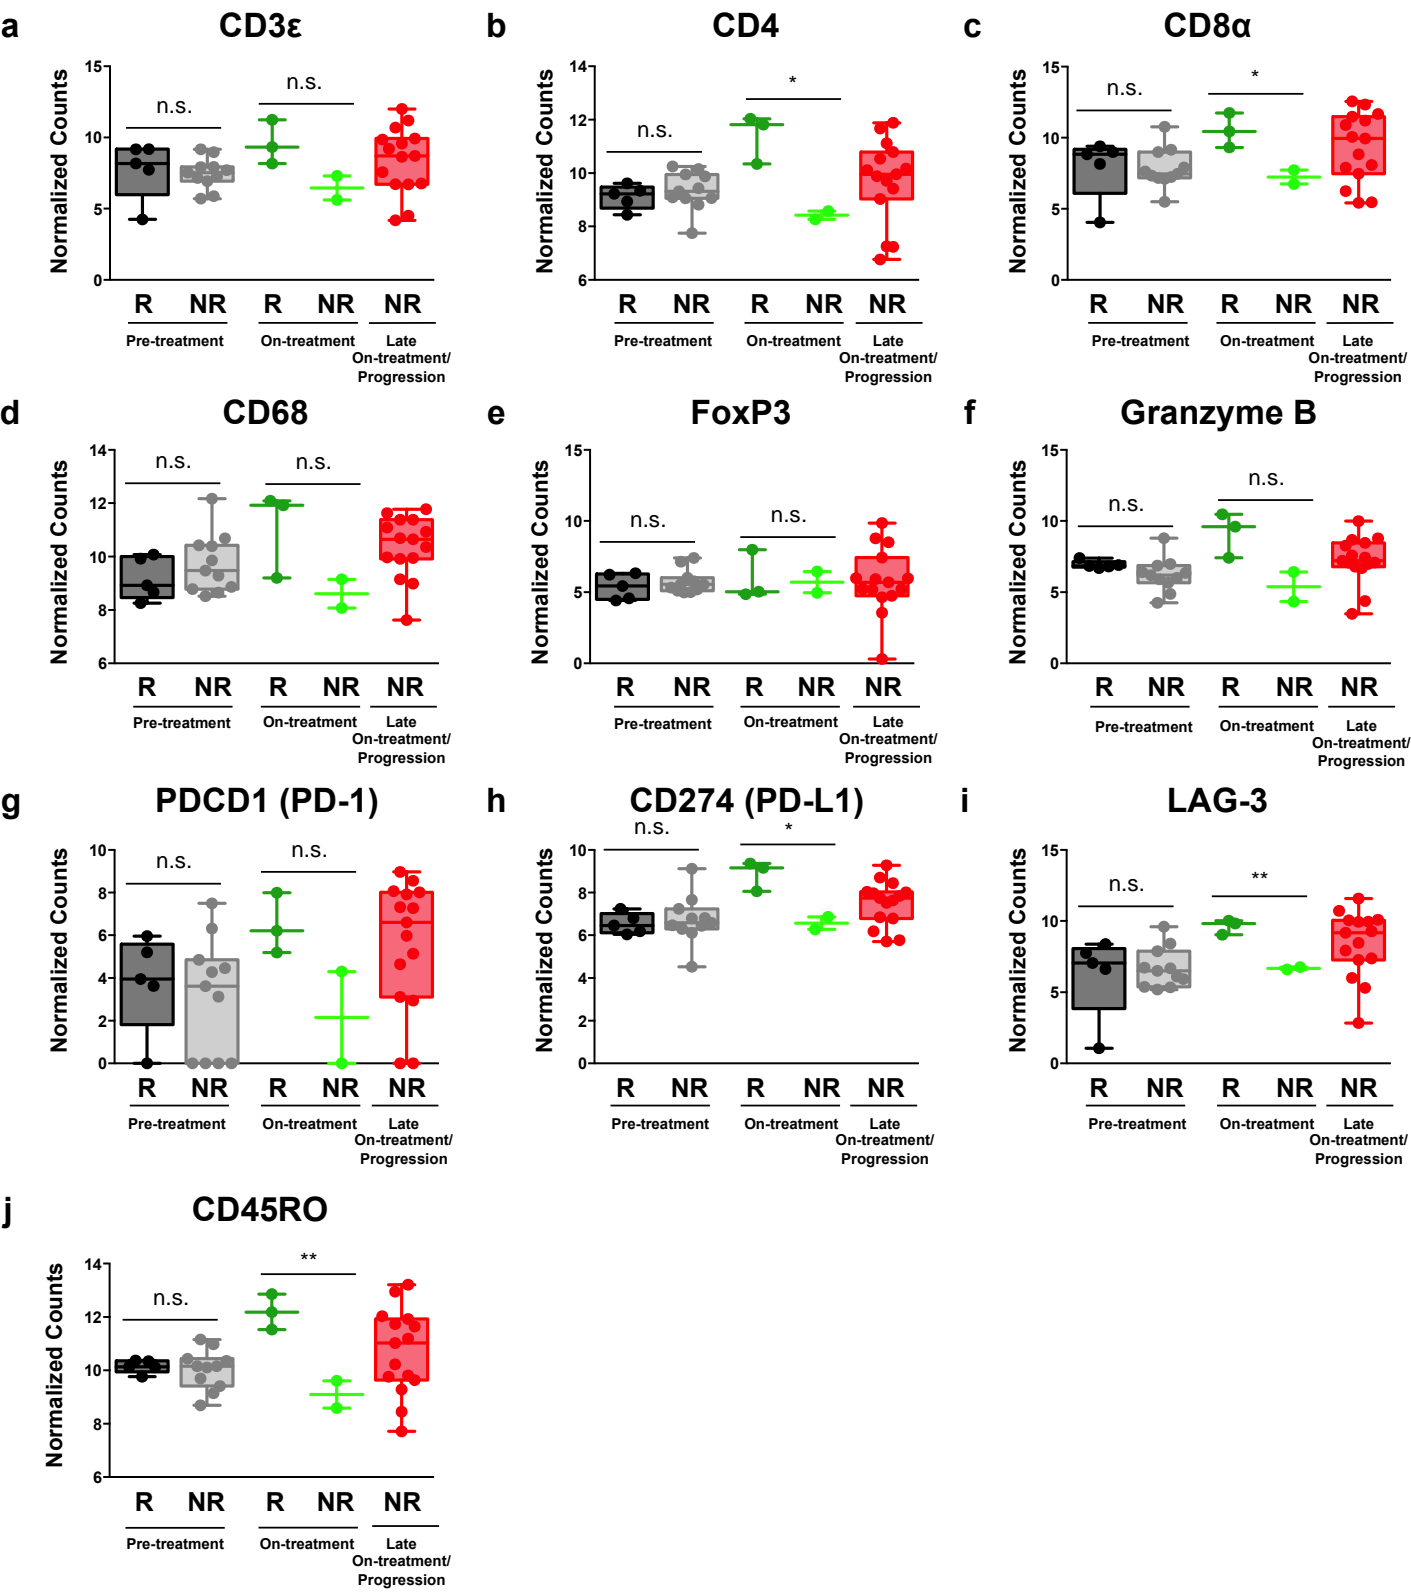

# Supplementary Figure 11

Chen *et al*

## PD-1 Blockade

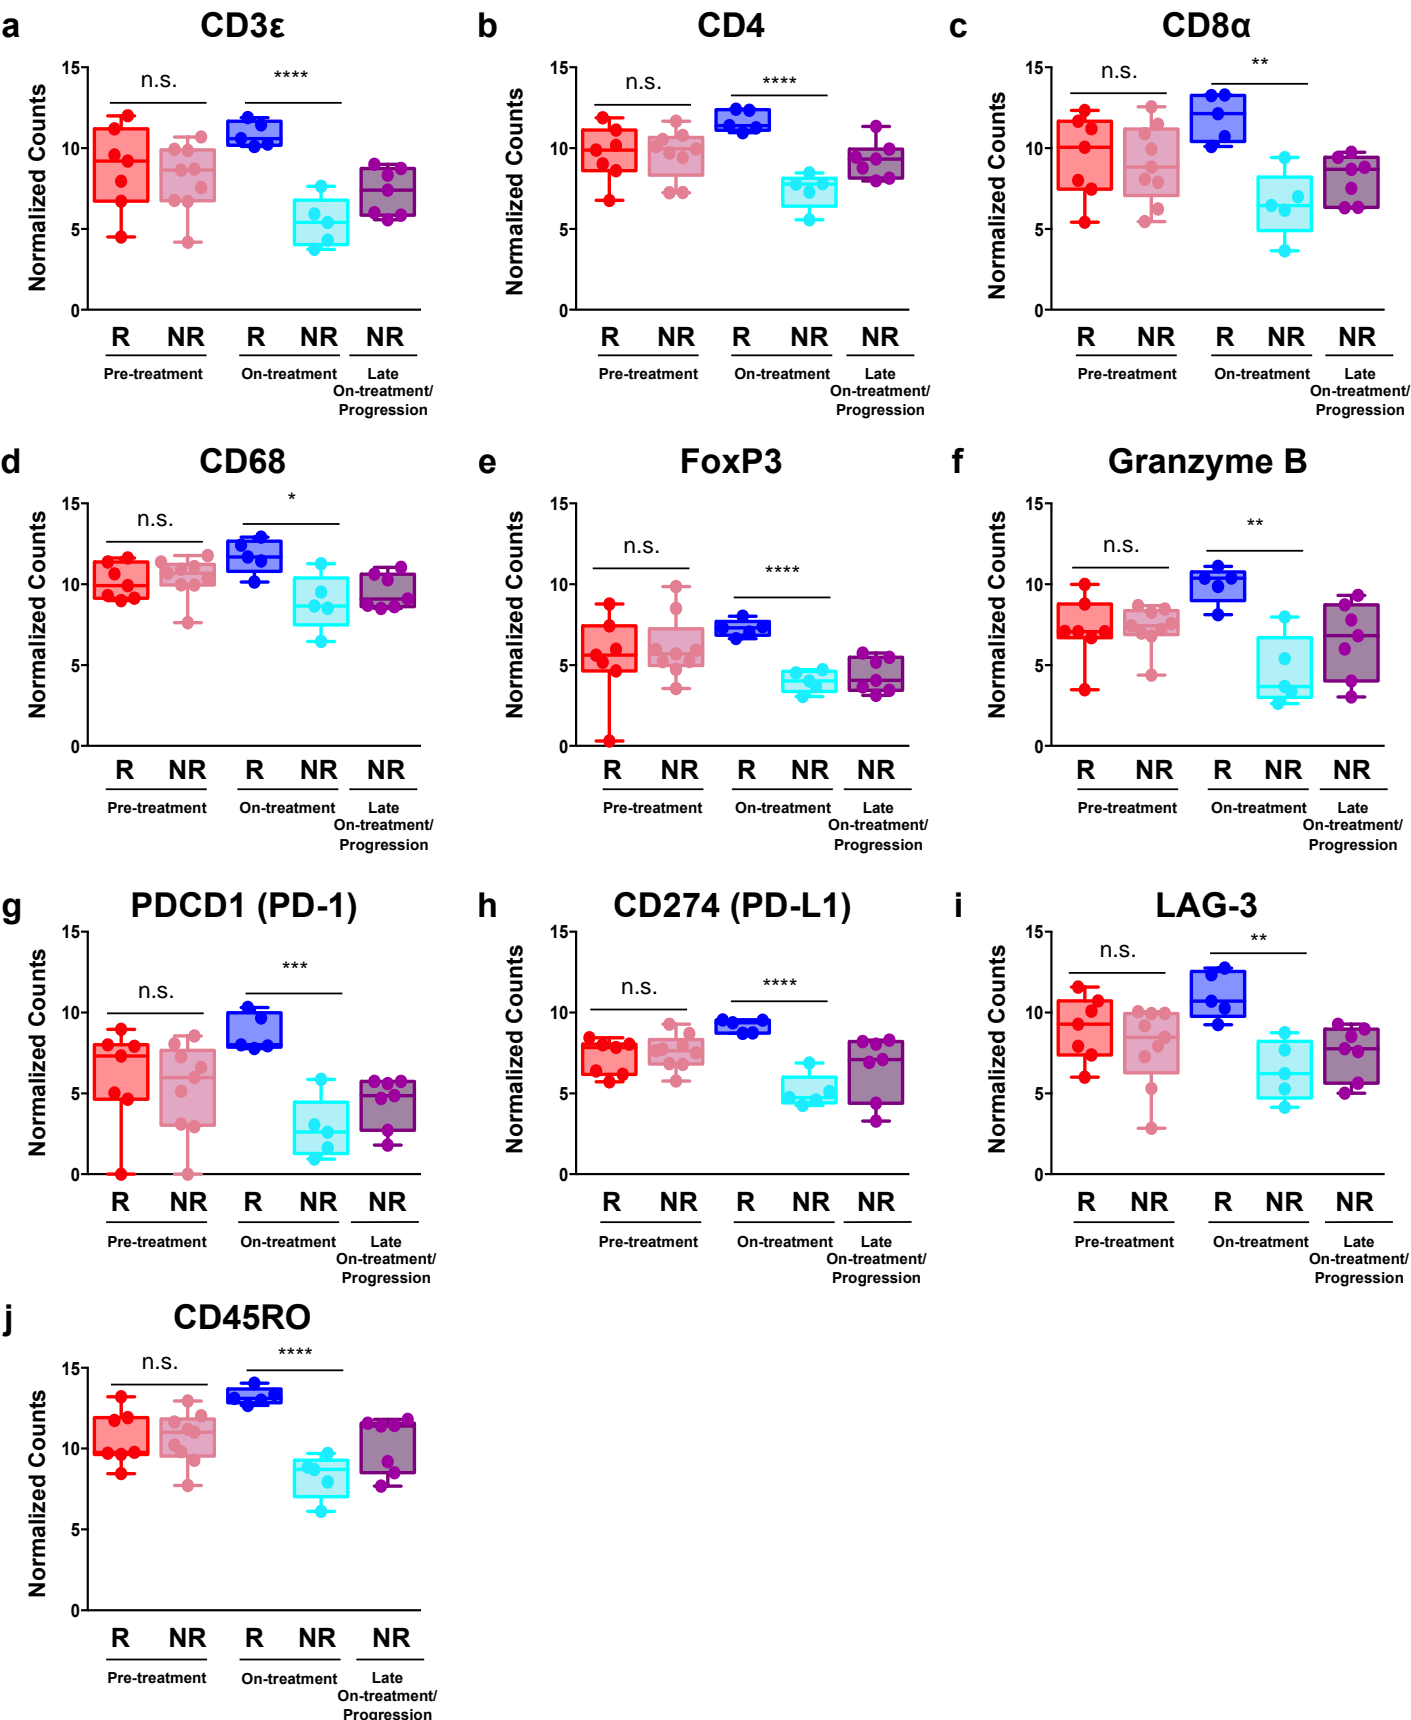

# Supplementary Figure S12

Chen *et al*

## Pre-treatment

### Responders

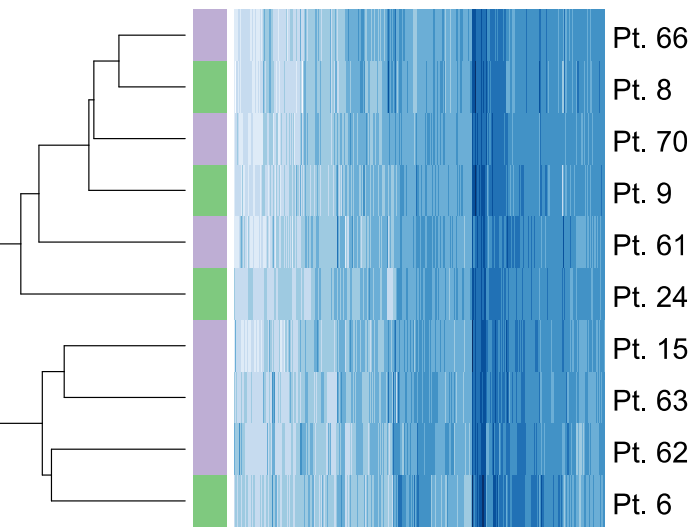

### Non-Responders

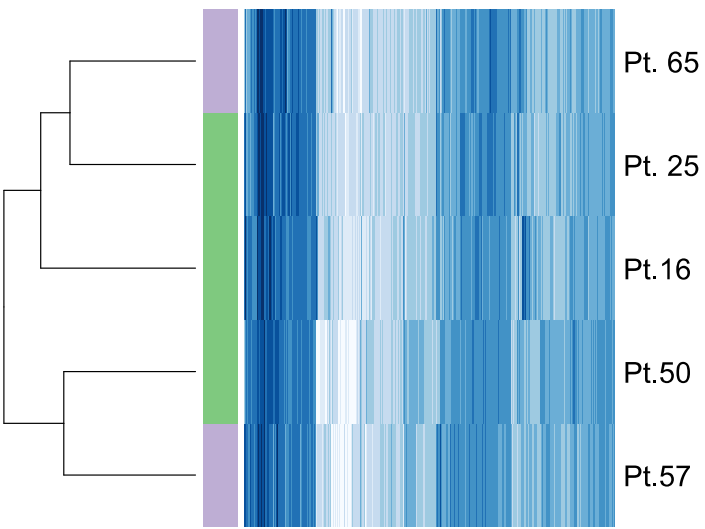

## On treatment

### Responders

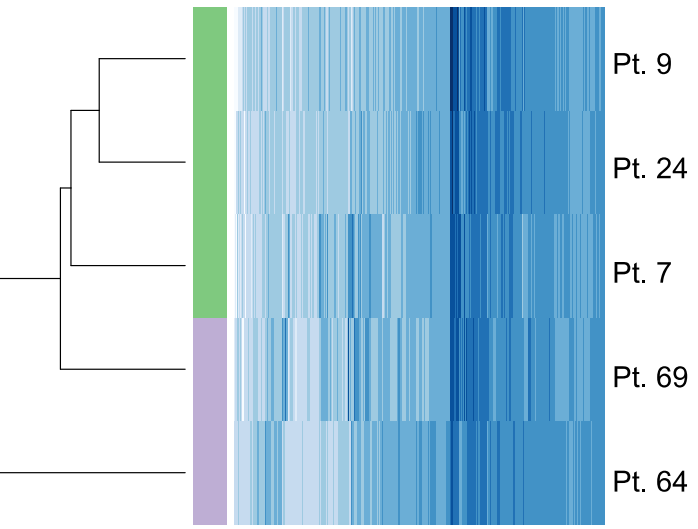

### Non-Responders

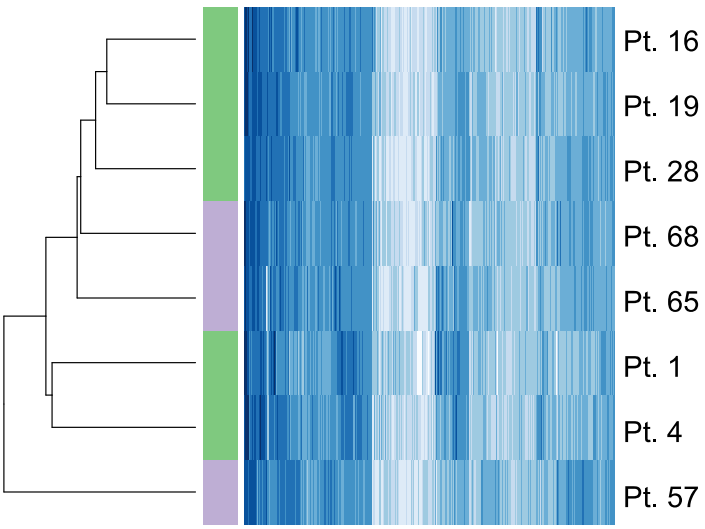

α-CTLA-4 naïve  
Prior α-CTLA-4

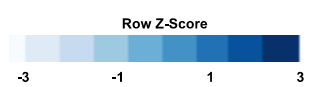

# Supplementary Figure S13

Chen *et al*

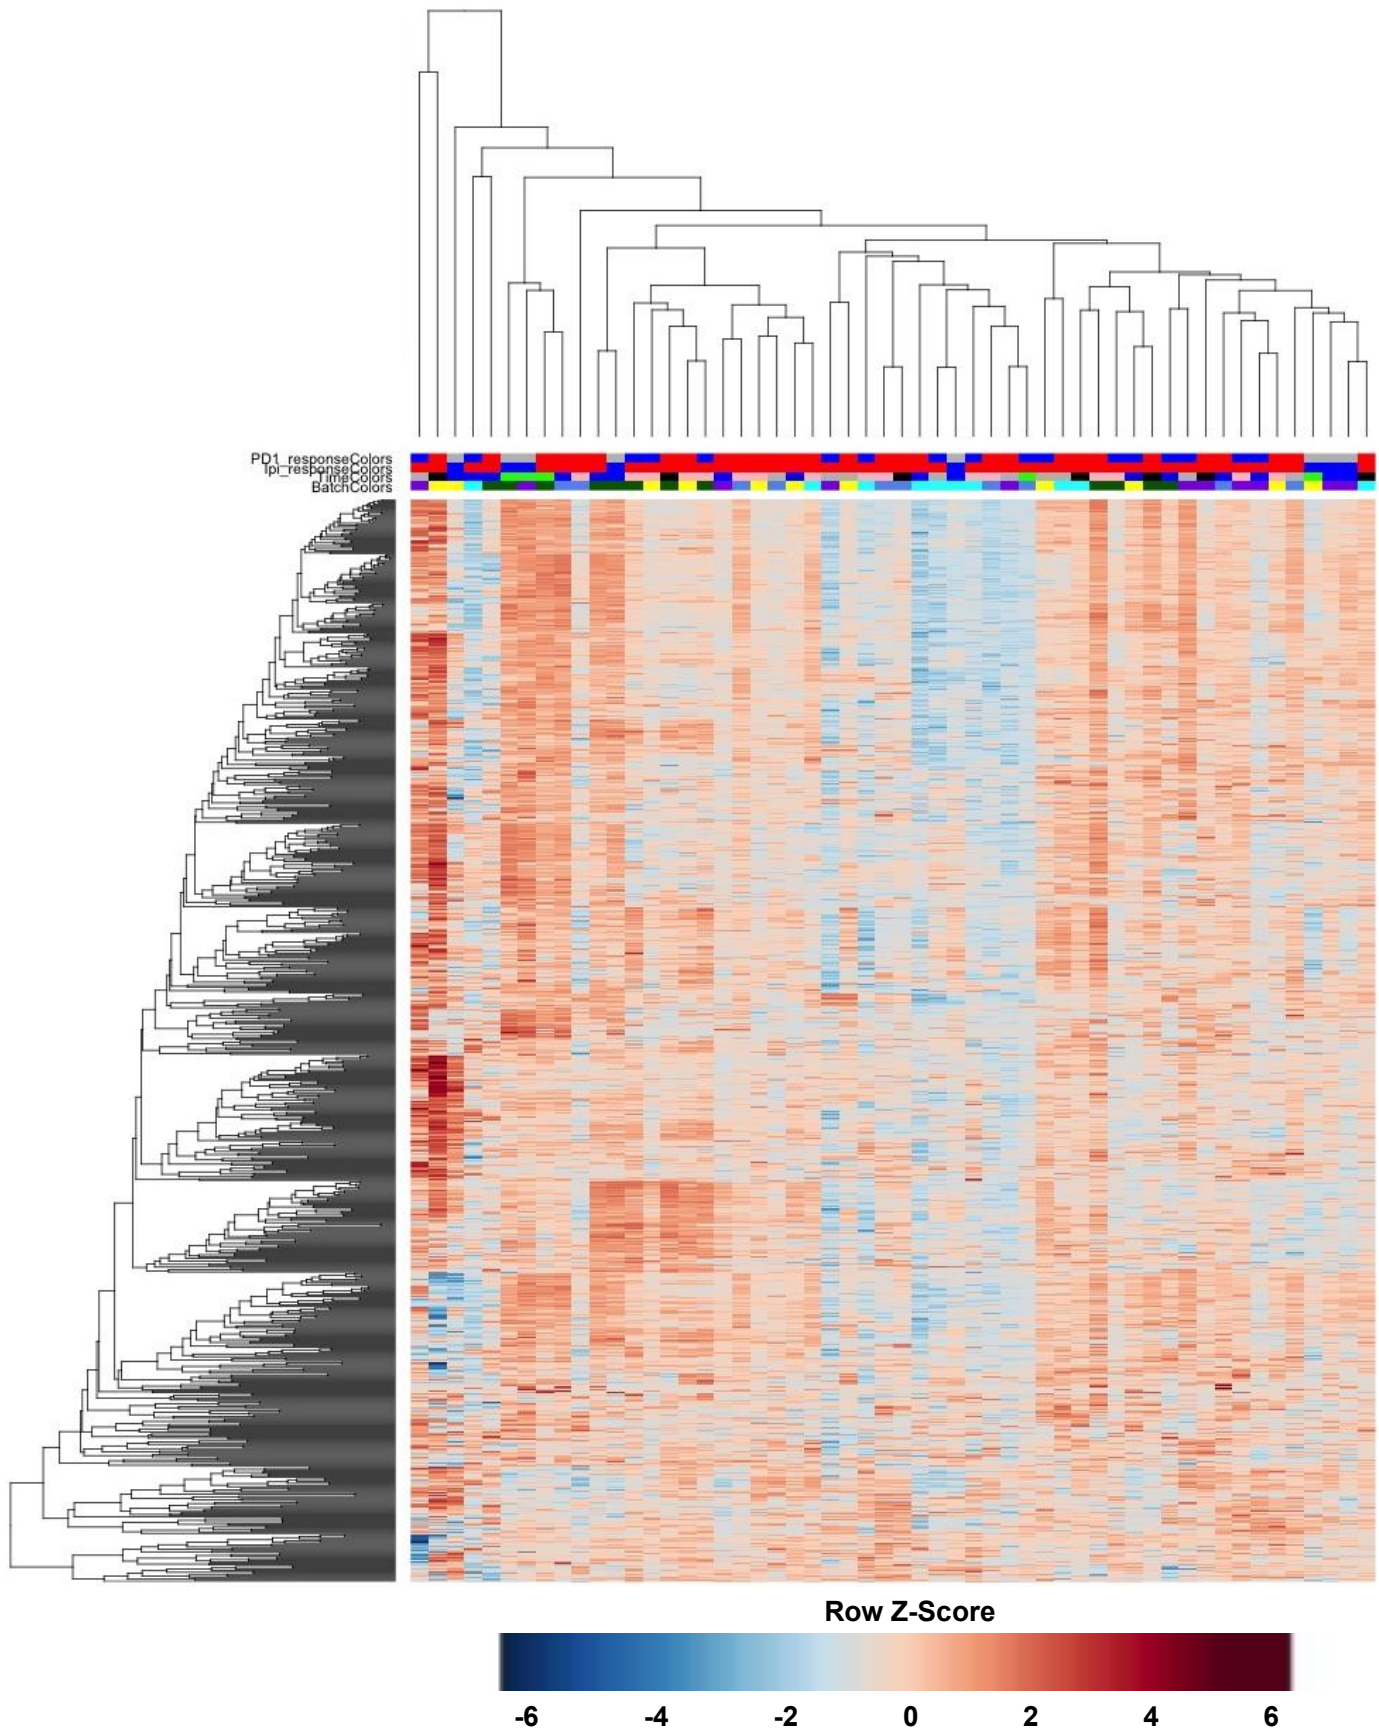

Supplement: NIHMS796563-supplement-2.pdf [file NIHMS796563-supplement-2.pdf]
